# Supplementary material for: Maize transposable elements contribute to long non-coding RNAs that are regulatory hubs for abiotic stress response
Source: PubMed Central journal article supplement (PMC6858665; doi:10.1186/s12864-019-6245-5), 2019-11-15

**Supplemental Figures:**

Figure S1: Bioinformatics pipeline for lncRNA identification, content and response to abiotic stress.

Figure S2: Chromosome distribution of long non-coding RNAs. Density were plotted on each chromosome.

Figure S3: Differential expressed genes under different abiotic stresses. A-D, Venn diagram of DEGs under stress condition across different development stage V3-V6. E-G, Venn diagram of DEGs under different stress conditions at one stage.

Figure S4: the relationships between module and trait.

Figure S5-9: the specific expression profiles of eigen-lncRNAs under different abiotic stresses across developmental stages.

Figure S1: Bioinformatics pipeline for lncRNA identification, content and response to abiotic stress.

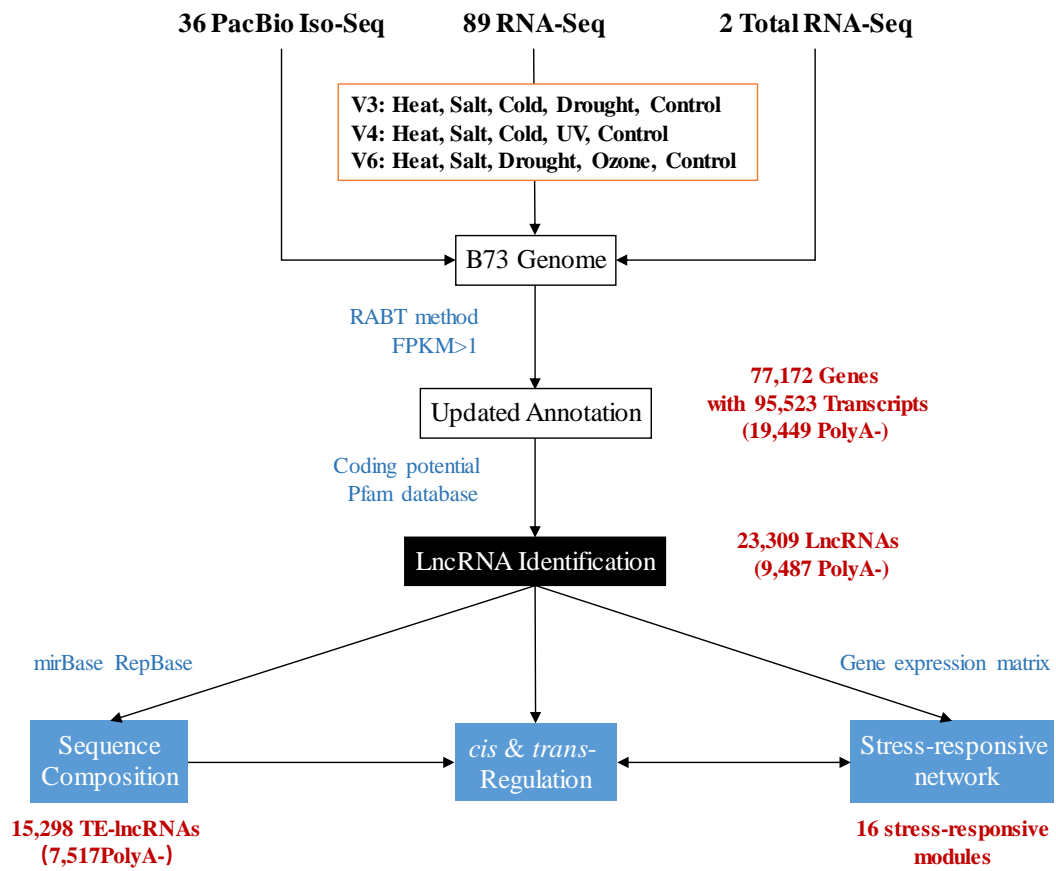

Figure S2: Chromosome distribution of long non-coding RNAs. Density were plotted on each chromosome.

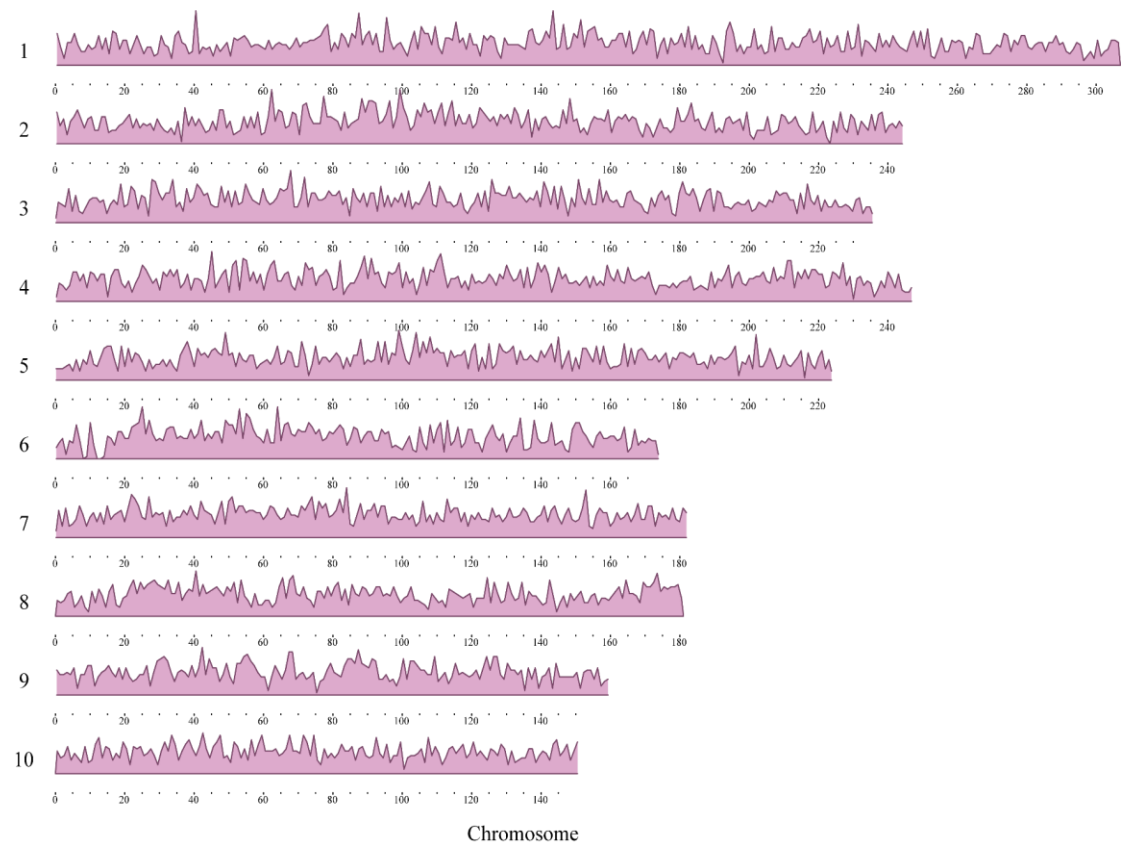

Figure S3: DE-lncRNAs under abiotic stress

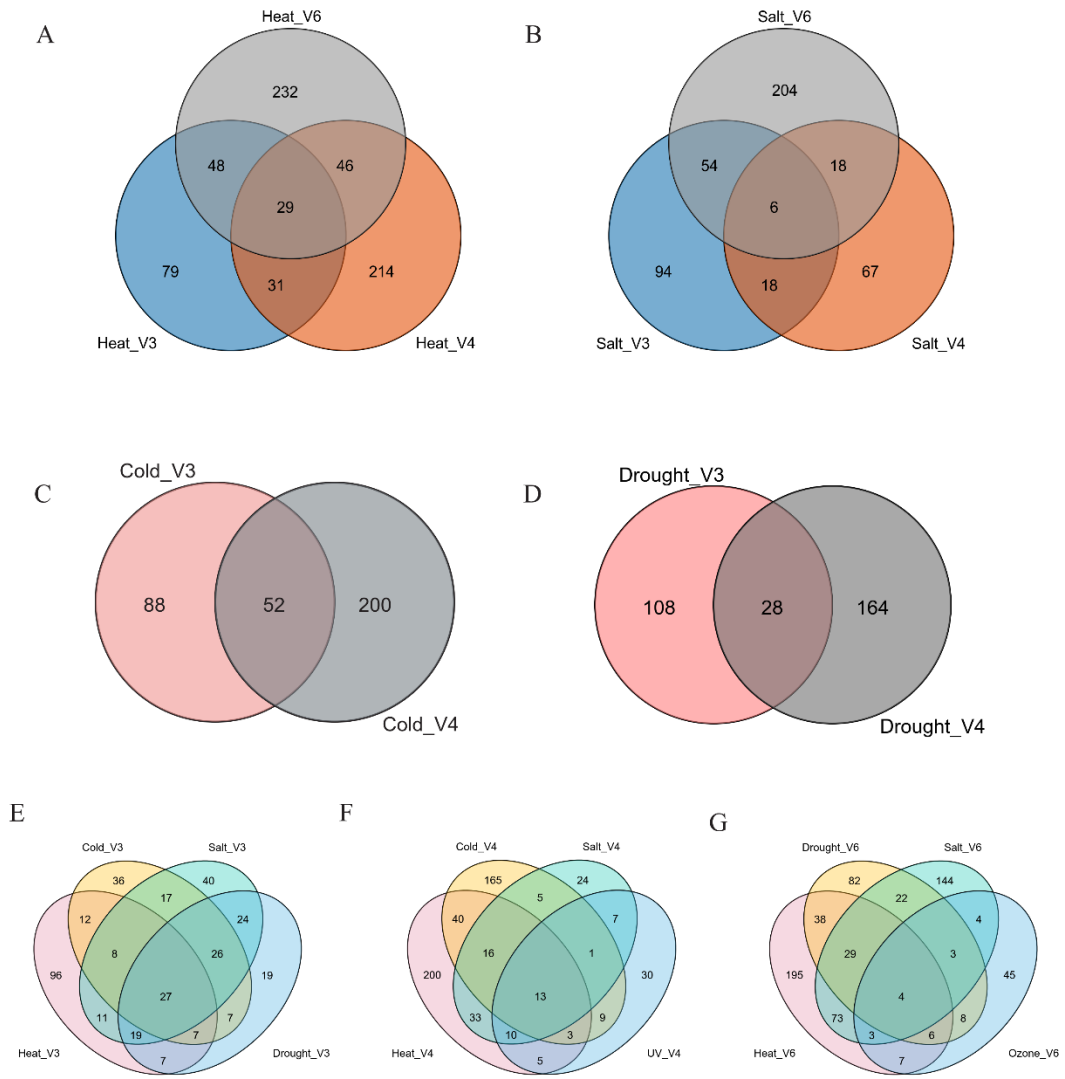



Figure S5: The expression profile of hub genes in cold-associated modules

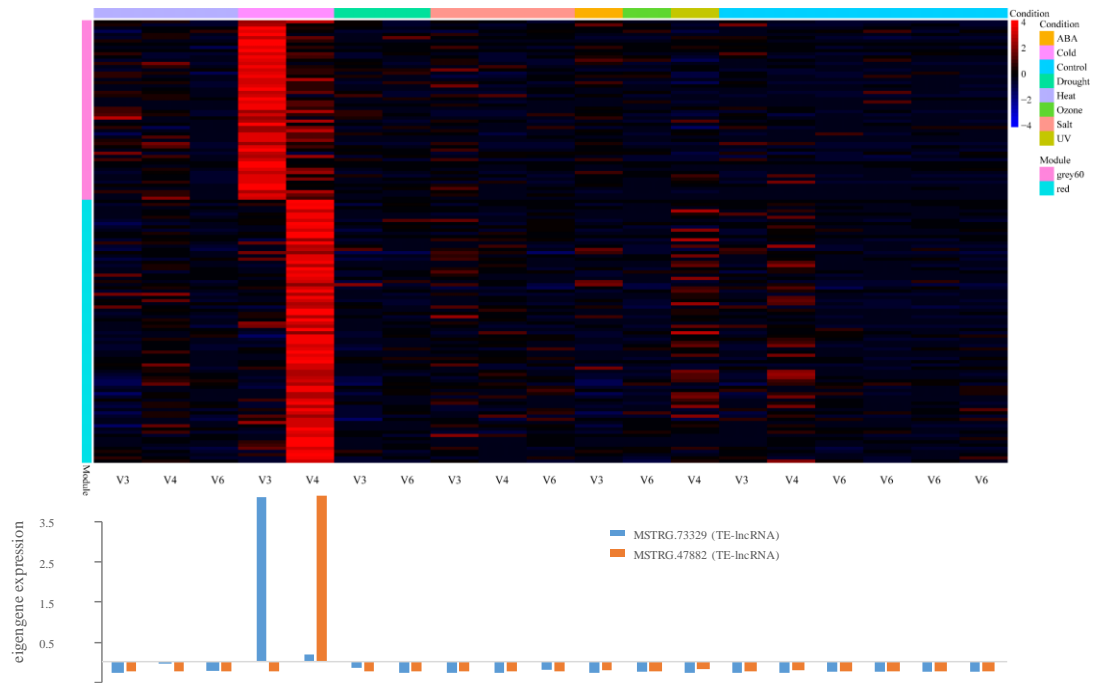

Figure S6: The expression profile of hub genes in drought-associated modules

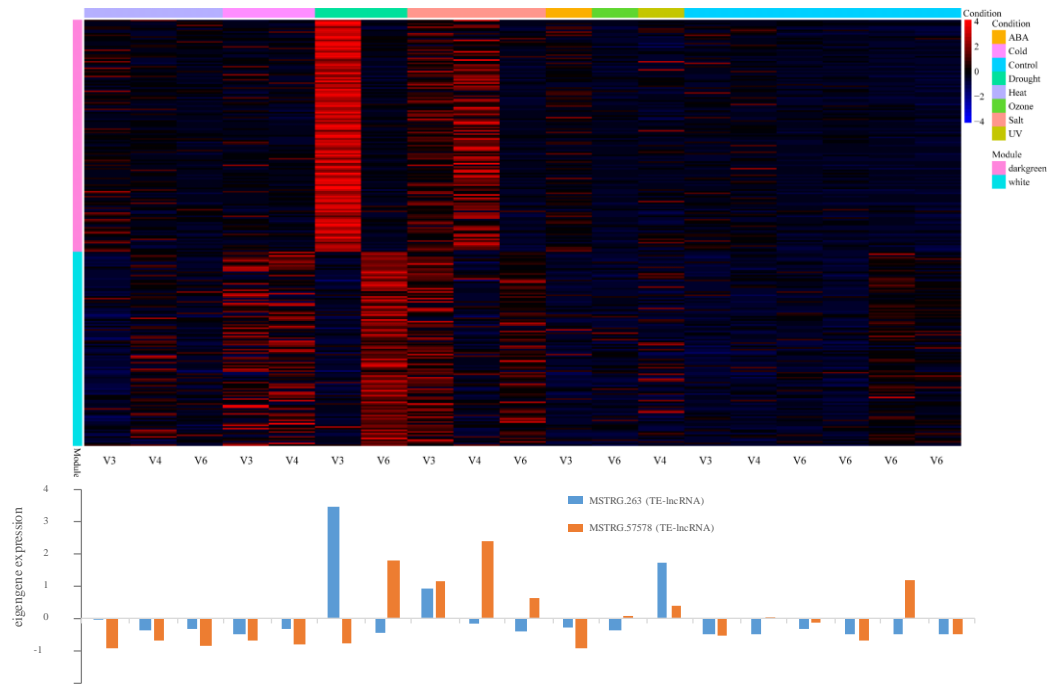

Figure S7: The expression profile of hub genes in salt-associated modules

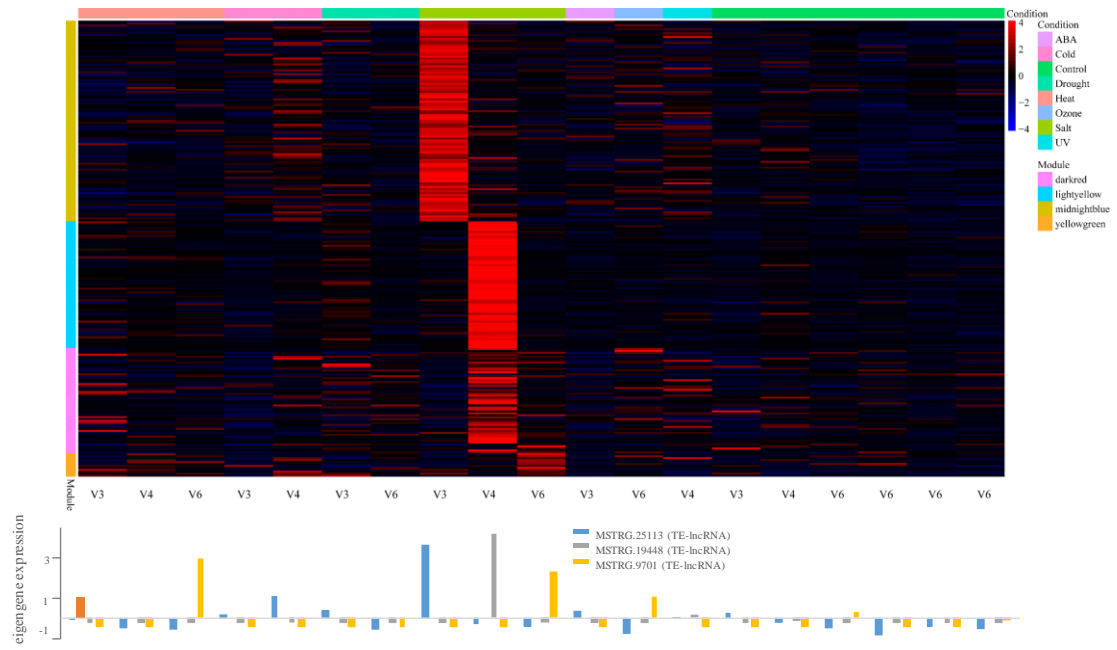



Figure S8: The expression profile of hub genes in UV-associated modules

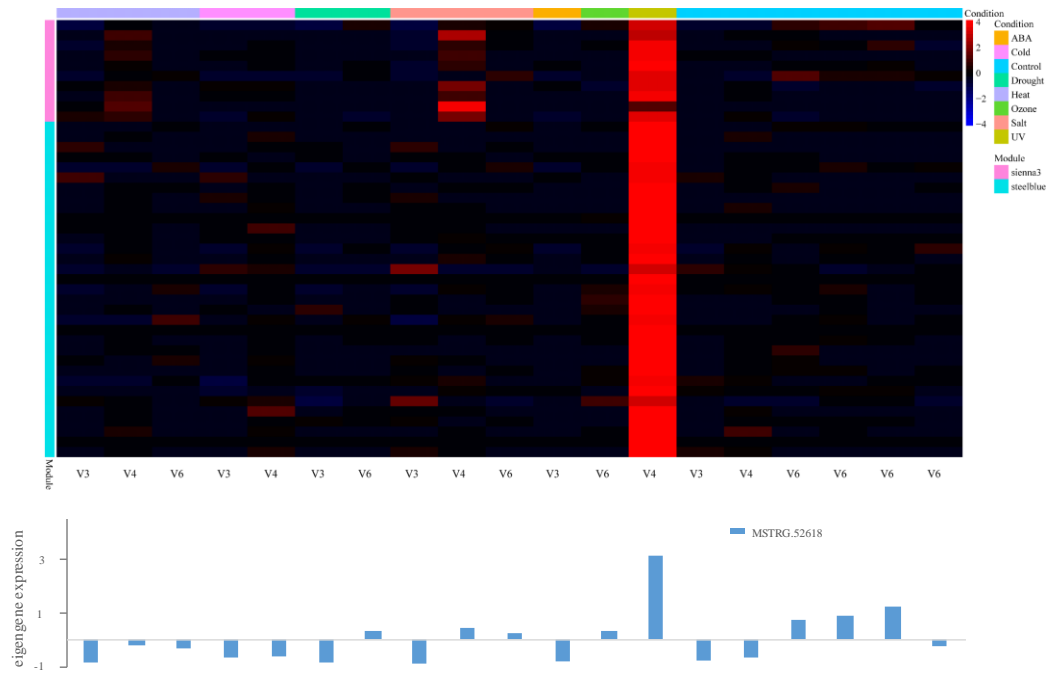

Figure S9: The expression profile of hub genes in ozone-associated modules

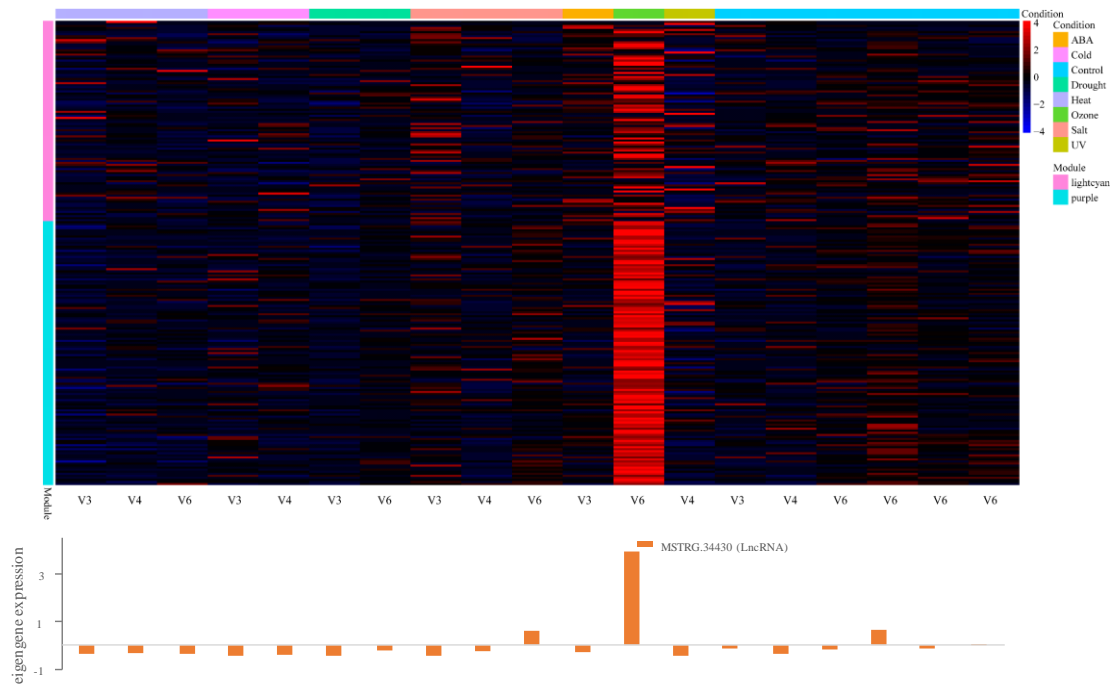

Supplement: 12864_2019_6245_MOESM1_ESM.pdf [file 12864_2019_6245_MOESM1_ESM.pdf]
